# Supplementary material for: High Risk Population Isolate Reveals Low Frequency Variants Predisposing to Intracranial Aneurysms
Source: PLoS Genet. 2014 Jan 30;10(1):e1004134. doi: 10.1371/journal.pgen.1004134 (PMC3907358; doi:10.1371/journal.pgen.1004134)
Supplement: Table S5 — Previous GWAS studies of the sIA disease. Association results are reported according to chromosomal loci and differing SNP is indicated above each study column if different from primary study. Each cell reports [odds ratio; (pvalue); risk allele; allele frequency in controls] (e.g 1.6 (4.5E-4) 38%) unless otherwise noted. (XLS) [file pgen.1004134.s011.xls]

## Sheet: Sheet1
					2q33.1	4q31.23	8q11.12 (1)	8q11.12 (1)	9p21.3	10q24.32	13q13.1	18q11.2
	Populations	IA cases	Controls	SNP density	rs700651	rs6841581	rs10958409	rs9298506	rs1333040	rs12413409	rs9315204	rs11661542
Bilguvar et al	Finland	874	944	831 534	1.21 (5.6E-3) G 42%		1.31 (1.4E-3) A 18%	1.50 (4.6E-7) A 73%	1.22 (2.8E-3) T 47%
2008	Netherlands	706	5332	831 534	1.23 (5.0E-4) G 34%		1.46 (1.4E-7) A 15%	1.34 ( 2.3E-4) A 81%	1.33 (2.3E-4) T 55%
	Japan	495	676	15	1.30 (1.1E-3) G 46%		1.26 (1.6E-2) A 25%	1.14 ( 2.5E-1) A 81%	1.32 (2.4E-3) T 65%
	total	2075	6952	831 534	1.24 (4.40E-08)		1.36 (1.4E-10)	1.35 (1.80E-9)	1.29 (1.4E-10)
Yasuno et al	Finland	808	4393	831 532			1.23 (5.1E-3) A 19%	1.39 (1.0E-5) A 76%	1.39 (5.3E-8) T 45%	1.27 (4.2E-2) G 91%	1.27 (1.7E-4) T 33%	1.14 (2.3E-2) C 44%
2010	Netherlands	708	3954	831 532			1.36 (1.1E-4 ) A 15%*	1.36 (4.0E-5) A 81%*	1.30 (4.8E-5) T 56%	1.23 (9.6E-2) G 91%*	1.25 (2.6E-3) T 21%*	1.23 (8.7E-3) C 49%*
	Germany	789	2228	831 532			1.09 (3.0E-1) A 15%*	1.15 (1.1E-1) A 81%*	1.32 (1.4E-5) T 56%*	1.66 (4.9E-5) G 91%*	1.13 (1.1E-1) T 21%*	1.23 (8.7E-4) C 49%*
	Aneurist (2)	475	1940	831 532			1.32 (1.3E-2) A 15%*	1.34 (1.1E-2) A 81%*	1.25 (8.0E-3) T 56%*	1.44 (2-1E-2) G 91%*	1.15 (1.4E-1) T 21%*	1.30 (4.4E-5) C 49%*
	Japan 1	829	761	13			1.17 (6.1E-2) A 28%*	1.14 (1.9E-1) A 79%*	1.41 (3.4E-5) T 66%*	1.27 (7.3E-3) G 74%*	1.16 (7.8E-2) 24%*	1.24 (6.1E3) C 61%*
	Japan 2	2282	905	13			1.04 (6.0E-1) A 28%*	1.25 (2.2E-3) A 79%*	1.26 (4.0E-4) T 66%*	1.21 (6.2E-3) G 74%*	1.19 (1.1E-2) 24%*	1.20 (2.3E-3) C 61%*
	total	5891	14181	831 532			1.17 (9.0E-7)	1.28 (1.3E-12)	1.32 (1.5E-22)	1.29 (1.2E-9)	1.20 (2.5E-9)	1.22 (1.1E-12)
					rs787994
Yasuno et al 2011	Finland	808	4393	831 532	1.25 (2.9E-4) FIN T 35.5%†	1.31 (4.0E-3) FIN G 86%†
(Followup of Yasuno 2010)
	Netherlands	708	3954	831 532	1.25 (8.2E-4) EUR T 27.2%†	1.23 (7.3E-4) EUR G 84.8%†
	Germany	789	2228	831 532	1.02 (7.9E-1) EUR T 27.2%†	1.10 (3.3E-1) EUR G 84.8%†
	Aneurist(2)	475	1940	831 532	1.07 (4.5E-1) EUR T 27.2%†	1.55 (7.7E-4) EUR G 84.8%†
	Japan 1	829	761	25	1.17 (7.0E-2) JPT T 27.5%†	1.21 (2.3E-2) JPT G 70.2%†
	Japan 2	2282	905	25	0.78 (8.6E-5) JPT T 27.5%†	1.19 (6.6E-3) JPT G 70.2%†
	total	5891	14181	831 532	NA	1.22 (2.2E-8)
								rs1072737	rs6475606
Foroud et al.	White US residents 1	388	397	473 238					1.39 (1.3E-3) T 48%*
2012	(100% familial)
	White US residents 2	1095	1286	473 238					1.34 (4.29E-7) EUR T 48%*
	(27% familial)
	total	1483	1683	473 238		p > 1E-2 (3)		NA (8.7E-5)	1.35 (3.59E-8)	p > 1E-2 (3)	p > 1E-4 (3)	p > 1E-2 (3)
					rs700651	rs6842241			rs10757272	rs11191514	rs1980781
Low et al.	Japan 1	1383	5484	565 149		1.26 (4.0E-6) A 69.3%			1.18 (7.75E-4) T 65.4%
2012	Japan 2	1048	7212			1.23 (3.67E-4) A 69.4%			1.25 (5.45E-5) T 64.5%
	total	2431	12696	565 149	0.95 (9.75E-1) G 48.8%	1.25 (9.58E-9) A 69.4%	1.14 (6.22E-3) A 27.5%	1.12 (4.5E-2) A 80%	1.21 (1.55E-7) T 64.9%	1.15 (6.95E-3) G 74.3%	1.22 (9.52E-5) G 24.1%	1.11 (2.14E-2) C 61.8%
† allele frequency not available. 1000 genomes frequency of indicated population given
(1) Indendent loci
(2) (Germany, Great Britain, Hungary, Netherlands, Switzerland, Spain
(3) Values not given in the publication. Limits inferred from supplementary locus zoom plots.
* = only combined risk allele frequency given
